# Supplementary material for: VennPainter: A Tool for the Comparison and Identification of Candidate Genes Based on Venn Diagrams
Source: PubMed Central journal article supplement (PMC4847855; doi:10.1371/journal.pone.0154315), 2016-04-27
Supplement: pone.0154315.s005.pdf [file pone.0154315.s005.pdf]

| <b>Species</b>       | <b>Assembly Version</b> | <b>download link</b>                                                                                                                                                                                                                                          |
|----------------------|-------------------------|---------------------------------------------------------------------------------------------------------------------------------------------------------------------------------------------------------------------------------------------------------------|
| <i>H. sapiens</i>    | GRCh38.p4               | <a href="ftp://ftp.ncbi.nlm.nih.gov/genomes/all/GCF_000001405.30_GRCh38.p4/GCF_000001405.30_GRCh38.p4_genomic.gff.gz">ftp://ftp.ncbi.nlm.nih.gov/genomes/all/GCF_000001405.30_GRCh38.p4/GCF_000001405.30_GRCh38.p4_genomic.gff.gz</a>                         |
| <i>G. gorilla</i>    | gorGor3.1               | <a href="ftp://ftp.ncbi.nlm.nih.gov/genomes/all/GCF_000151905.1_gorGor3.1/GCF_000151905.1_gorGor3.1_genomic.gff.gz">ftp://ftp.ncbi.nlm.nih.gov/genomes/all/GCF_000151905.1_gorGor3.1/GCF_000151905.1_gorGor3.1_genomic.gff.gz</a>                             |
| <i>M. mulatta</i>    | Mmul_051212             | <a href="ftp://ftp.ncbi.nlm.nih.gov/genomes/all/GCF_000002255.3_Mmul_051212/GCF_000002255.3_Mmul_051212_genomic.gff.gz">ftp://ftp.ncbi.nlm.nih.gov/genomes/all/GCF_000002255.3_Mmul_051212/GCF_000002255.3_Mmul_051212_genomic.gff.gz</a>                     |
| <i>N. leucogenys</i> | Nleu_3.0                | <a href="ftp://ftp.ncbi.nlm.nih.gov/genomes/all/GCF_000146795.2_Nleu_3.0/GCF_000146795.2_Nleu_3.0_genomic.gff.gz">ftp://ftp.ncbi.nlm.nih.gov/genomes/all/GCF_000146795.2_Nleu_3.0/GCF_000146795.2_Nleu_3.0_genomic.gff.gz</a>                                 |
| <i>P. abelii</i>     | P_pygmaeus_2.0.2        | <a href="ftp://ftp.ncbi.nlm.nih.gov/genomes/all/GCF_000001545.4_P_pygmaeus_2.0.2/GCF_000001545.4_P_pygmaeus_2.0.2_genomic.gff.gz">ftp://ftp.ncbi.nlm.nih.gov/genomes/all/GCF_000001545.4_P_pygmaeus_2.0.2/GCF_000001545.4_P_pygmaeus_2.0.2_genomic.gff.gz</a> |
| <i>P. paniscus</i>   | panpan1                 | <a href="ftp://ftp.ncbi.nlm.nih.gov/genomes/all/GCF_000258655.1_panpan1/GCF_000258655.1_panpan1_genomic.gff.gz">ftp://ftp.ncbi.nlm.nih.gov/genomes/all/GCF_000258655.1_panpan1/GCF_000258655.1_panpan1_genomic.gff.gz</a>                                     |
| <i>R. roxellana</i>  | Rrox_v1                 | <a href="ftp://ftp.ncbi.nlm.nih.gov/genomes/all/GCF_000769185.1_Rrox_v1/GCF_000769185.1_Rrox_v1_genomic.gff.gz">ftp://ftp.ncbi.nlm.nih.gov/genomes/all/GCF_000769185.1_Rrox_v1/GCF_000769185.1_Rrox_v1_genomic.gff.gz</a>                                     |
